# Supplementary material for: Pulmonary Arterial Hypertension and Adverse Outcomes after Kidney Transplantation: A Systematic Review and Meta-Analysis
Source: J Clin Med. 2022 Mar 31;11(7):1944. doi: 10.3390/jcm11071944 (PMC8999673; doi:10.3390/jcm11071944)
Supplement: Supplementary file 1 [file jcm-11-01944-s001.zip]

Archive with 4 entries (4 files):
- File S1. PROSPERO registration (CRD42022306978).pdf
- Table S1. PRISMA checklist.pdf
- Table S2 Databases and search strategy.pdf
- Table S3 Quality assessment.pdf
