# Supplementary material for: Pulmonary Arterial Hypertension and Adverse Outcomes after Kidney Transplantation: A Systematic Review and Meta-Analysis
Source: J Clin Med. 2022 Mar 31;11(7):1944. doi: 10.3390/jcm11071944 (PMC8999673; doi:10.3390/jcm11071944)
Supplement: Supplementary file 1 [file jcm-11-01944-s001.zip › Table S3 Quality assessment.pdf]

**Table S3.** Quality assessment of included studies using Newcastle-Ottawa scale.

| Study          | Representativeness of the exposed cohort | Selection of the non-exposed cohort | Ascertainment of exposure | Presence of outcome of interest at the start | Comparability of cohorts | Assessment of outcome | Follow-up long enough for outcomes to occur | Adequacy of follow-up | Total |
|----------------|------------------------------------------|-------------------------------------|---------------------------|----------------------------------------------|--------------------------|-----------------------|---------------------------------------------|-----------------------|-------|
| Issa, 2008     | *                                        | *                                   | *                         | *                                            | *                        |                       | *                                           |                       | 6     |
| Nguyen, 2021   | *                                        | *                                   | *                         | *                                            | *                        | *                     | *                                           | *                     | 8     |
| Obi, 2020      | *                                        | *                                   | *                         | *                                            | *                        | *                     | *                                           |                       | 7     |
| Rabih, 2022    | *                                        | *                                   | *                         | *                                            | *                        | *                     | *                                           | *                     | 8     |
| Sadat, 2021    | *                                        | *                                   | *                         | *                                            | *                        |                       | *                                           |                       | 6     |
| Goyal, 2018    | *                                        | *                                   | *                         | *                                            | *                        | *                     | *                                           |                       | 7     |
| Wang, 2018     | *                                        | *                                   | *                         | *                                            | *                        | *                     | *                                           |                       | 7     |
| Zlotnick, 2010 | *                                        | *                                   | *                         | *                                            | *                        |                       | *                                           |                       | 6     |
| Caughey, 2020  | *                                        | *                                   | *                         | *                                            | *                        | *                     | *                                           |                       | 7     |
| Abasi, 2020    | *                                        | *                                   | *                         | *                                            | *                        |                       | *                                           |                       | 6     |
| Foderaro, 2017 | *                                        | *                                   | *                         | *                                            | *                        |                       | *                                           | *                     | 7     |
| Joseph, 2021   | *                                        | *                                   | *                         | *                                            | *                        |                       | *                                           | *                     | 7     |

NA = not applicable.

Good quality: 3 or 4 stars in selection domain AND 1 or 2 stars in comparability domain AND 2 or 3 stars in outcome/exposure domain. Fair quality: 2 stars in selection domain AND 1 or 2 stars in comparability domain AND 2 or 3 stars in outcome/exposure domain. Poor quality: 0 or 1 star in selection domain OR 0 stars in comparability domain OR 0 or 1 stars in outcome/exposure domain.
